# Supplementary material for: Terpyridine-based ruthenium complexes containing a 4,5-diazafluoren-9-one ligand with light-driven enhancement of biological activity
Source: Royal Society of Chemistry journal article supplement (doi:10.1039/d4dt02562h), 2024-12-05
Supplement: d4dt02562h1.pdf [file d4dt02562h1.pdf]

## SUPPORTING INFORMATION

Terpyridine-based ruthenium complexes containing 4,5-diazafluoren-9-one ligand with light-driven enhancement of biological activity

Francisca Mayara Santos de Alencar,<sup>a</sup> Florencio Sousa Gouveia Jr,<sup>a</sup> Geângela de Fátima Sousa de Oliveira,<sup>a</sup> Alexandre Lopes Andrade,<sup>b</sup> Mayron Alves de Vasconcelos,<sup>c</sup> Alejandro Pedro Ayala,<sup>d</sup> Ana Claudia Silva Gondim,<sup>a</sup> Idalina Maria Moreira de Carvalho,<sup>a</sup> Carlos André Ferreira Moraes,<sup>e</sup> Marcos Vinícius Palmeira de Mello,<sup>e</sup> Alzir Azevedo Batista,<sup>e</sup> Luiz Gonzaga de França Lopes,<sup>a\*</sup> Eduardo Henrique Silva Sousa<sup>a\*</sup>

a- Group of Bioinorganic, Department of Organic and Inorganic Chemistry, Federal University of Ceara, Fortaleza, Brazil

b- Integrated Biomolecular Laboratory, Department of Pathology and Legal Medicine, Federal University of Ceara, Fortaleza, Brazil

c - Faculty of Education of Itapipoca, State University of Ceara (UECE), Itapipoca Brazil.

d- Department of Physics, Federal University of Ceara, Fortaleza, Brazil

e - Department of Chemistry, Federal University of São Carlos, Fortaleza, Brazil

\*Corresponding authors: [eduardohss@dqi.ufc.br](mailto:eduardohss@dqi.ufc.br); [lopeslu@dqi.ufc.br](mailto:lopeslu@dqi.ufc.br)

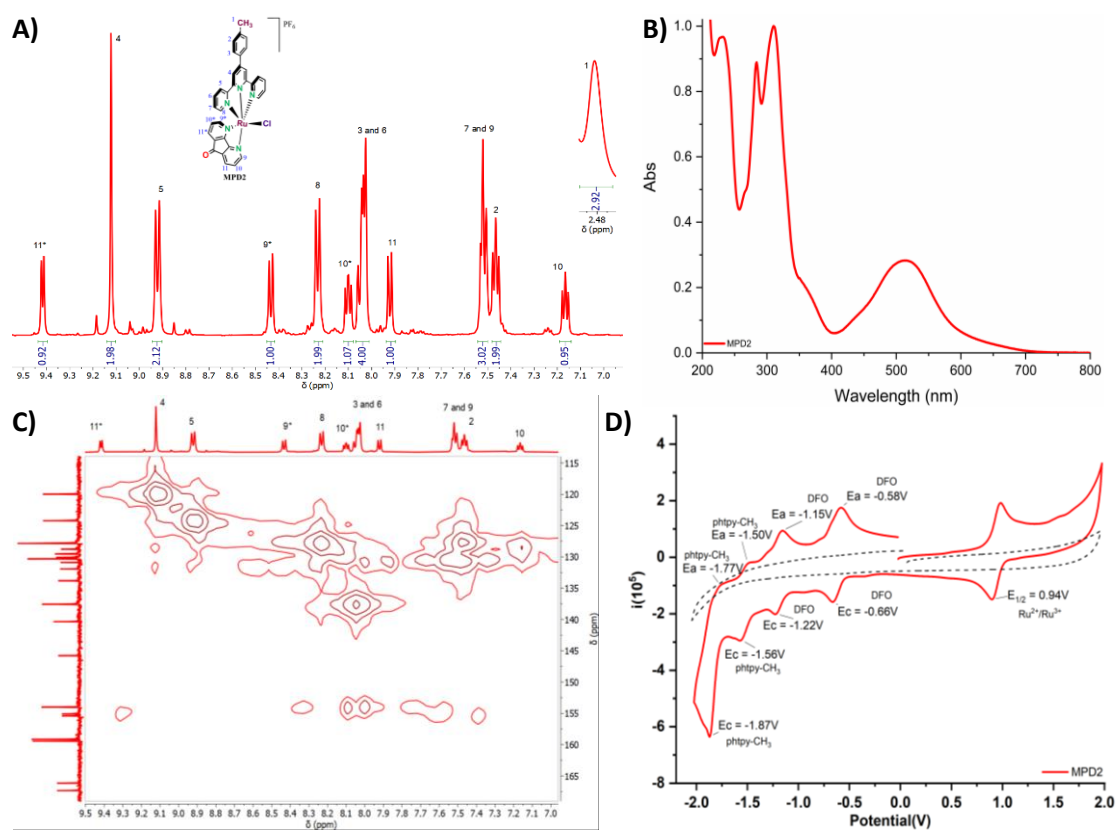

**Fig. S1.** For the **MPD2** complex: A)  $^1\text{H}$  NMR in  $(\text{CD}_3)_2\text{SO}$ ; B) Electronic absorption spectra in acetonitrile ( $3 \times 10^{-5} \text{ mol L}^{-1}$ ) at  $25 \text{ }^\circ\text{C}$ ; C) HSQC in  $(\text{CD}_3)_2\text{SO}$ ; D) Cyclic voltammogram in  $0.1 \text{ mol L}^{-1}$  TBAPF<sub>6</sub>/acetonitrile at  $25 \text{ }^\circ\text{C}$ , at a scan rate of  $0.100 \text{ Vs}^{-1}$ , using glassy carbon, platinum wire and Ag|AgCl as working, auxiliary and reference electrodes, respectively (ferrocene redox pair used as  $0.0 \text{ V}$  reference). The black dashed line represents a swept potential for the electrolyte solution only.

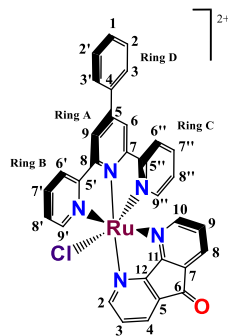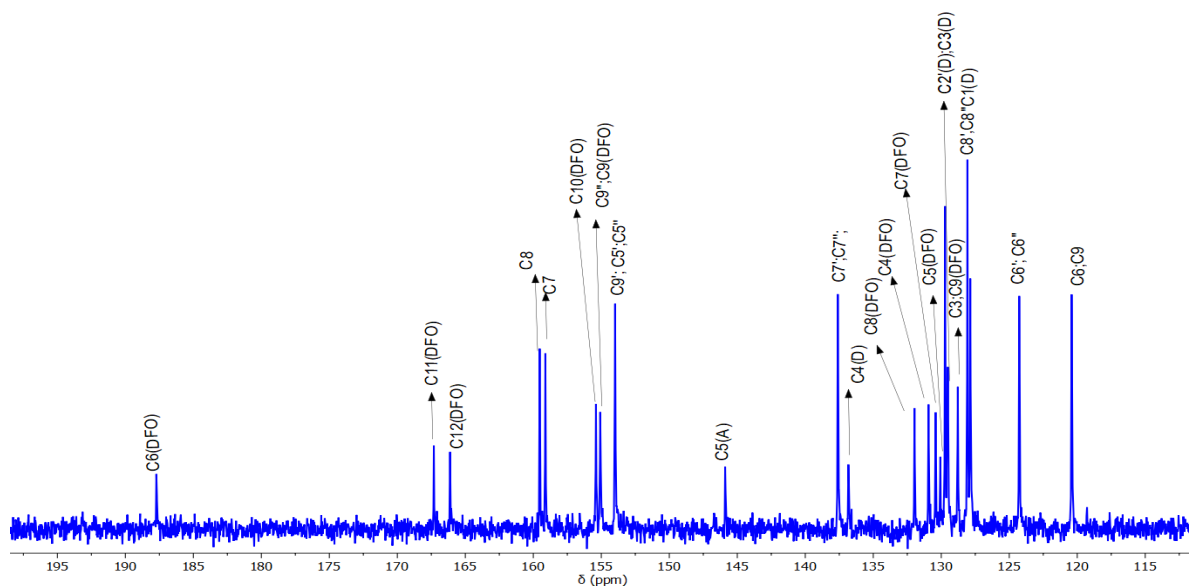

(A)

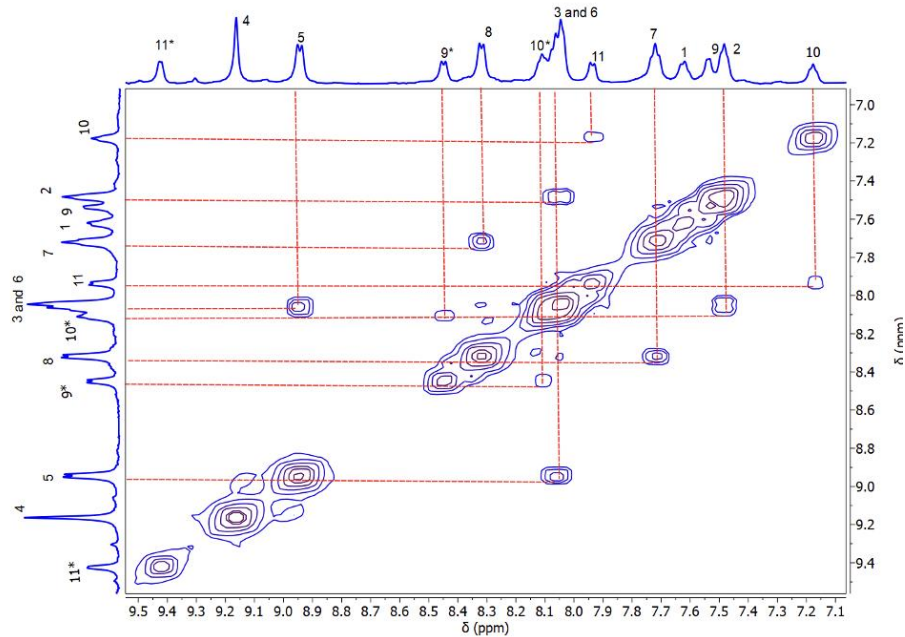

(B)

**Fig. S2.**  $^{13}\text{C}$  NMR for **MPD1** (A) and COSY (B) in  $(\text{CD}_3)_2\text{SO}$ .

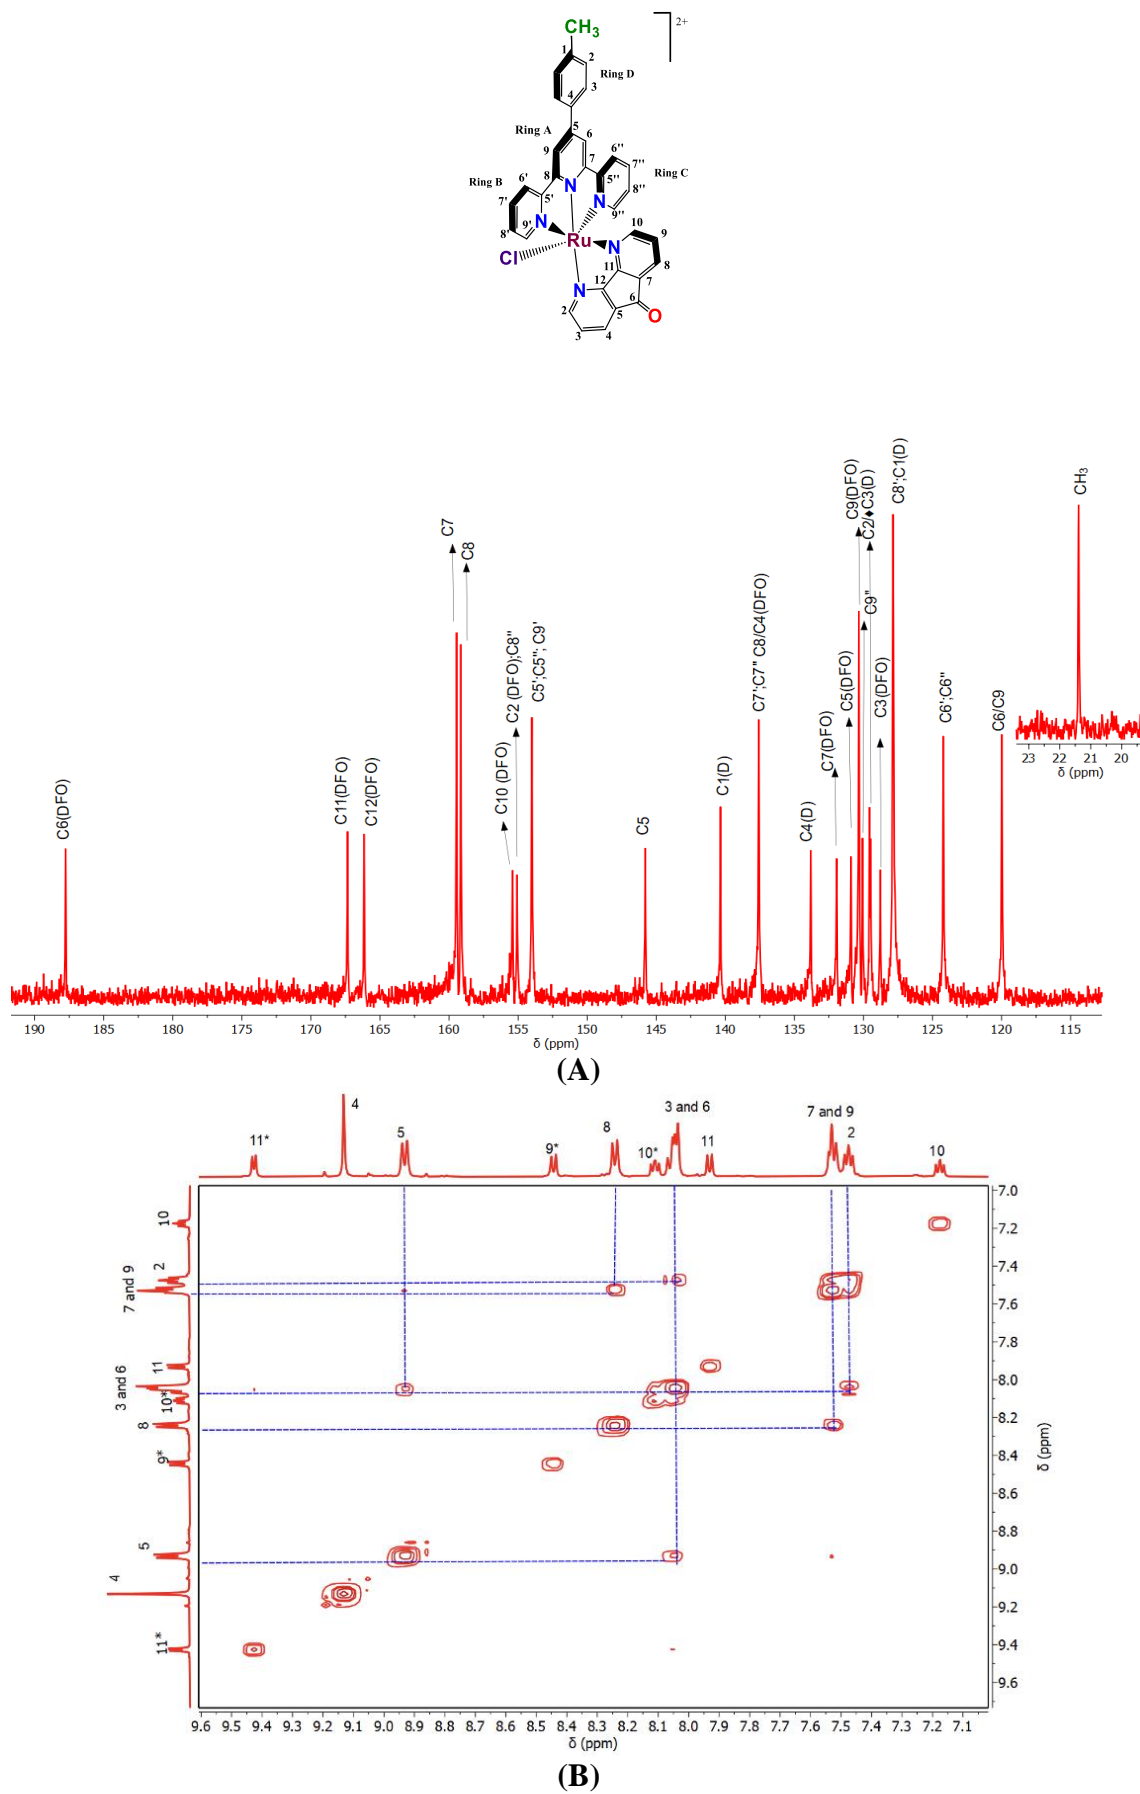

**Fig. S3.** <sup>13</sup>C NMR for **MPD2** (A) and COSY (B) in (CD<sub>3</sub>)<sub>2</sub>SO.

(A)

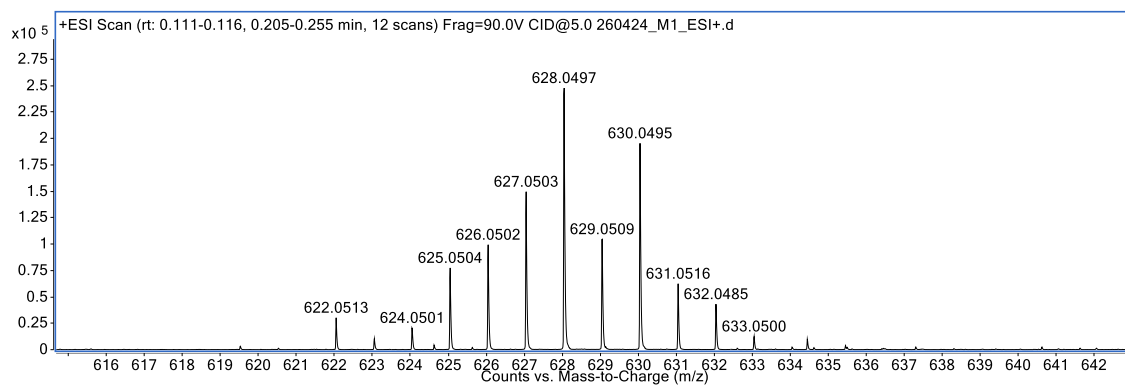

(B)

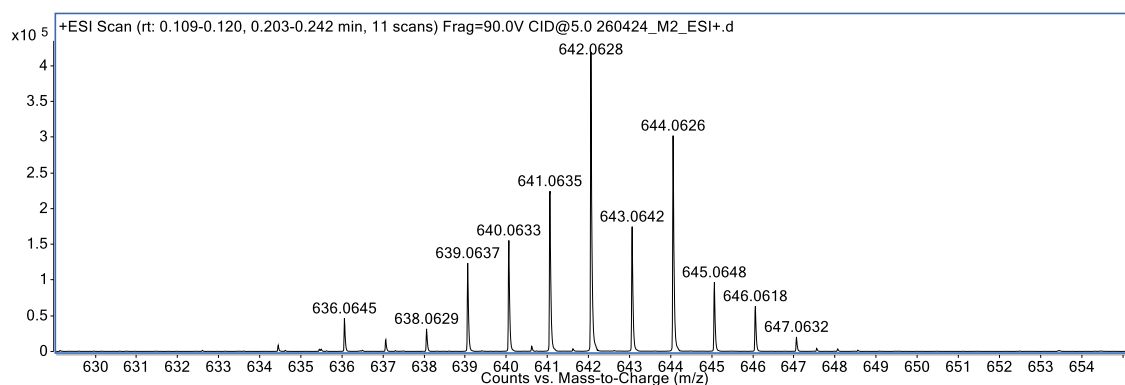

**Fig. S4.** High resolution mass spectrometry (ESI-TOF) for **MPD1** (A) and **MPD2** (B) in acetonitrile.

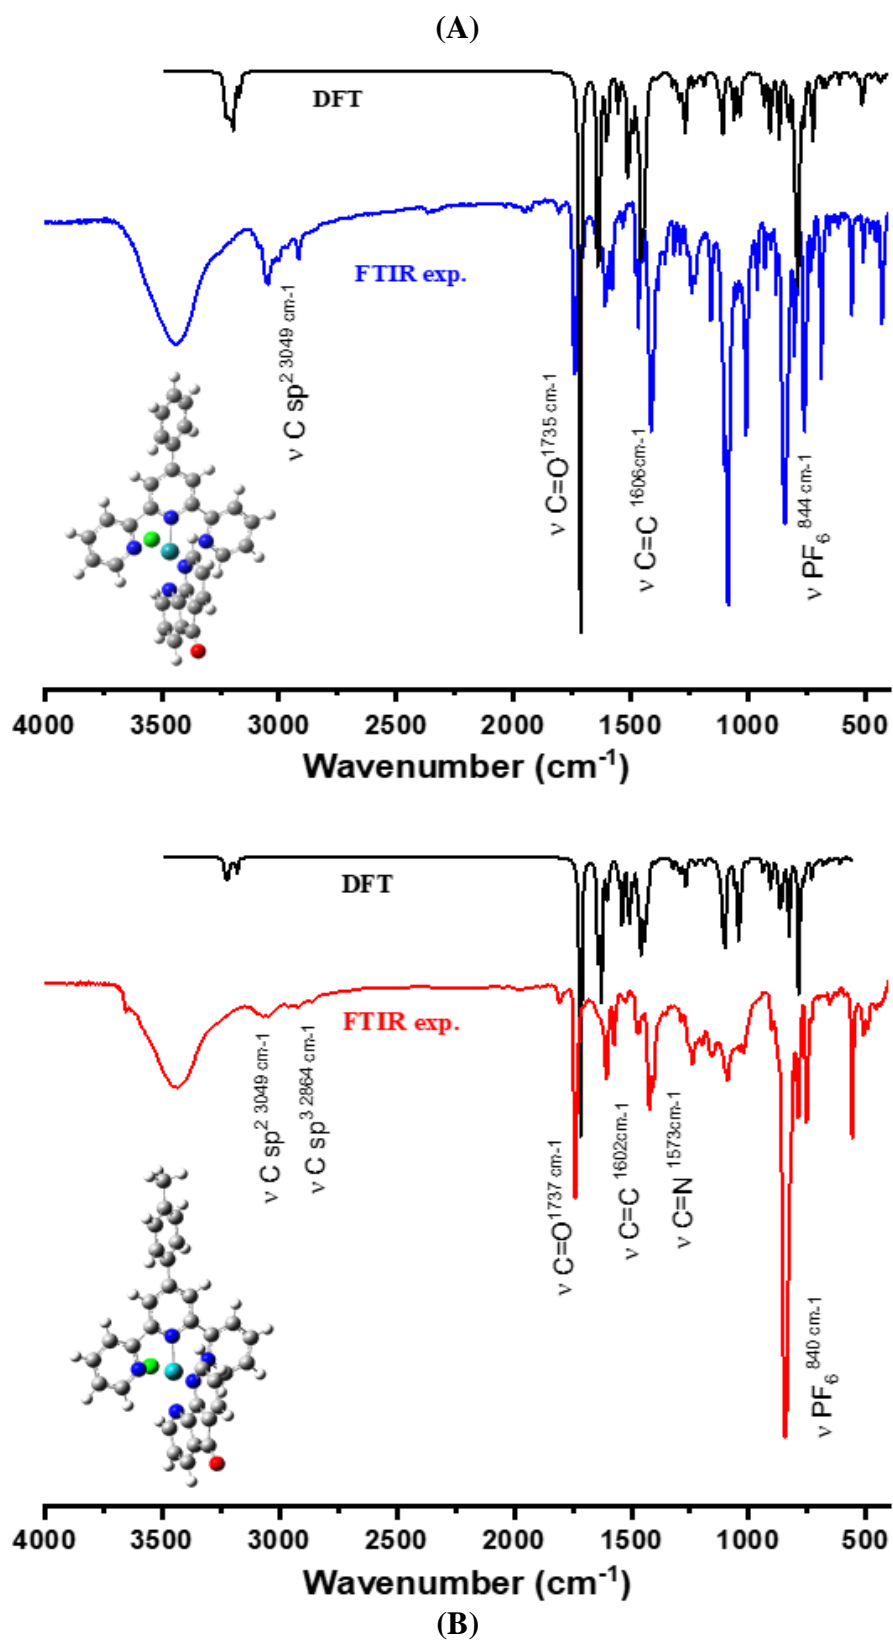

**Fig. S5.** Experimental FTIR spectra of (A) MPD1 and (B) MPD2 complexes dispersed in KBr (red lines) and calculated IR spectrum ions complexes (black lines). Inset: shows optimized structures of **MPD1** and **MPD2** in vacuum.

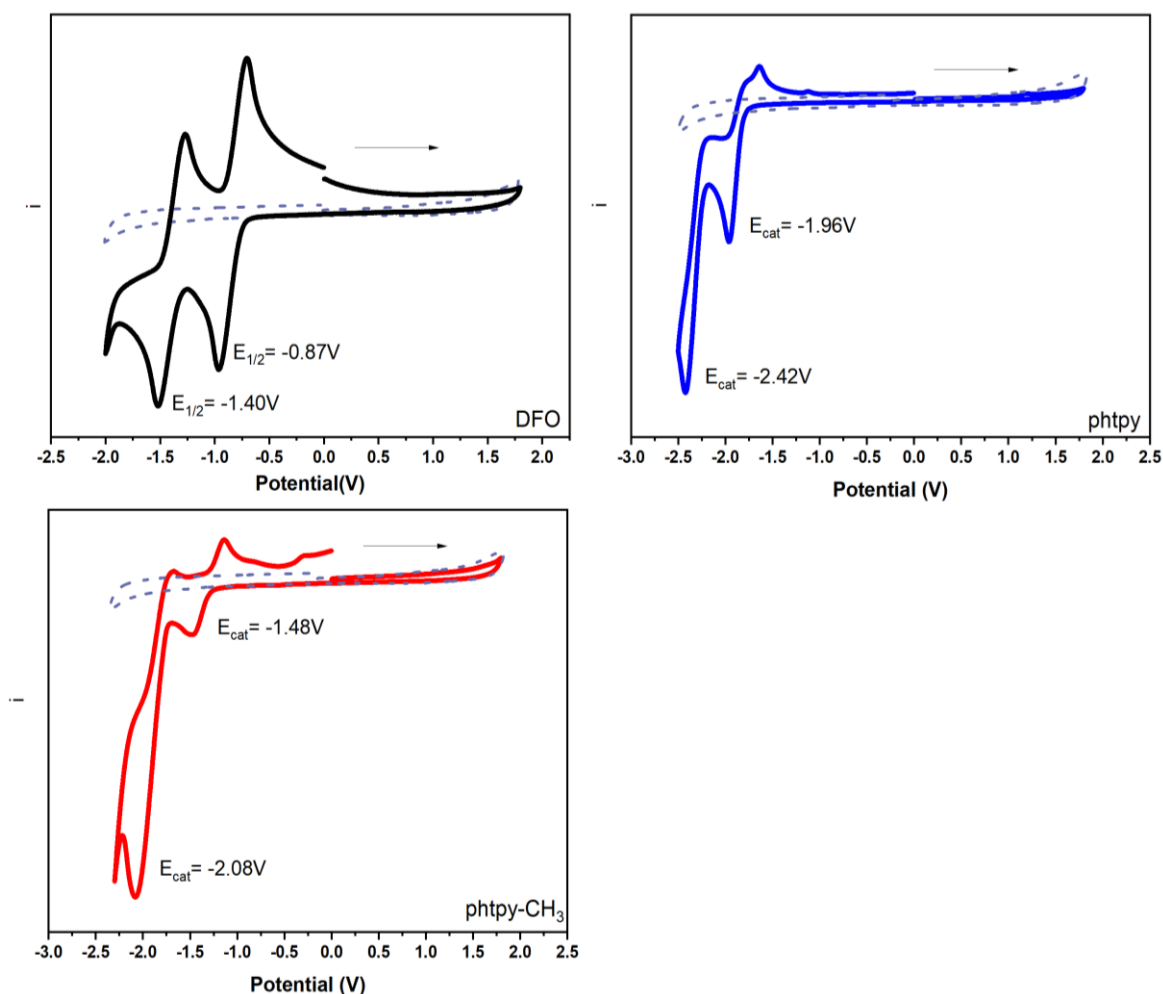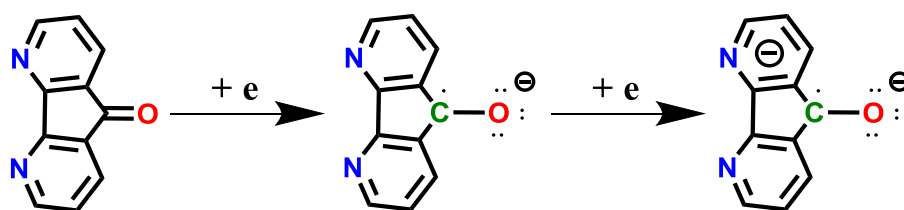

**Fig. S6.** Cyclic voltammograms of DFO (top, left), phtpy (top, right) and CH<sub>3</sub>-phtpy ligands (middle, left) carried out in 0.1 mol L<sup>-1</sup> TBAPF<sub>6</sub> electrolyte in acetonitrile, at a scan rate of 0.100 Vs<sup>-1</sup>, using glassy carbon, platinum wire and Ag|AgCl as working, auxiliary and reference electrodes, respectively (ferrocene redox pair used as 0.0 V reference); black dashed line represents the electrochemical scan of only the 0.1 mol L<sup>-1</sup> TBAPF<sub>6</sub> electrolyte in acetonitrile, and DFO ligand reduction scheme (bottom).

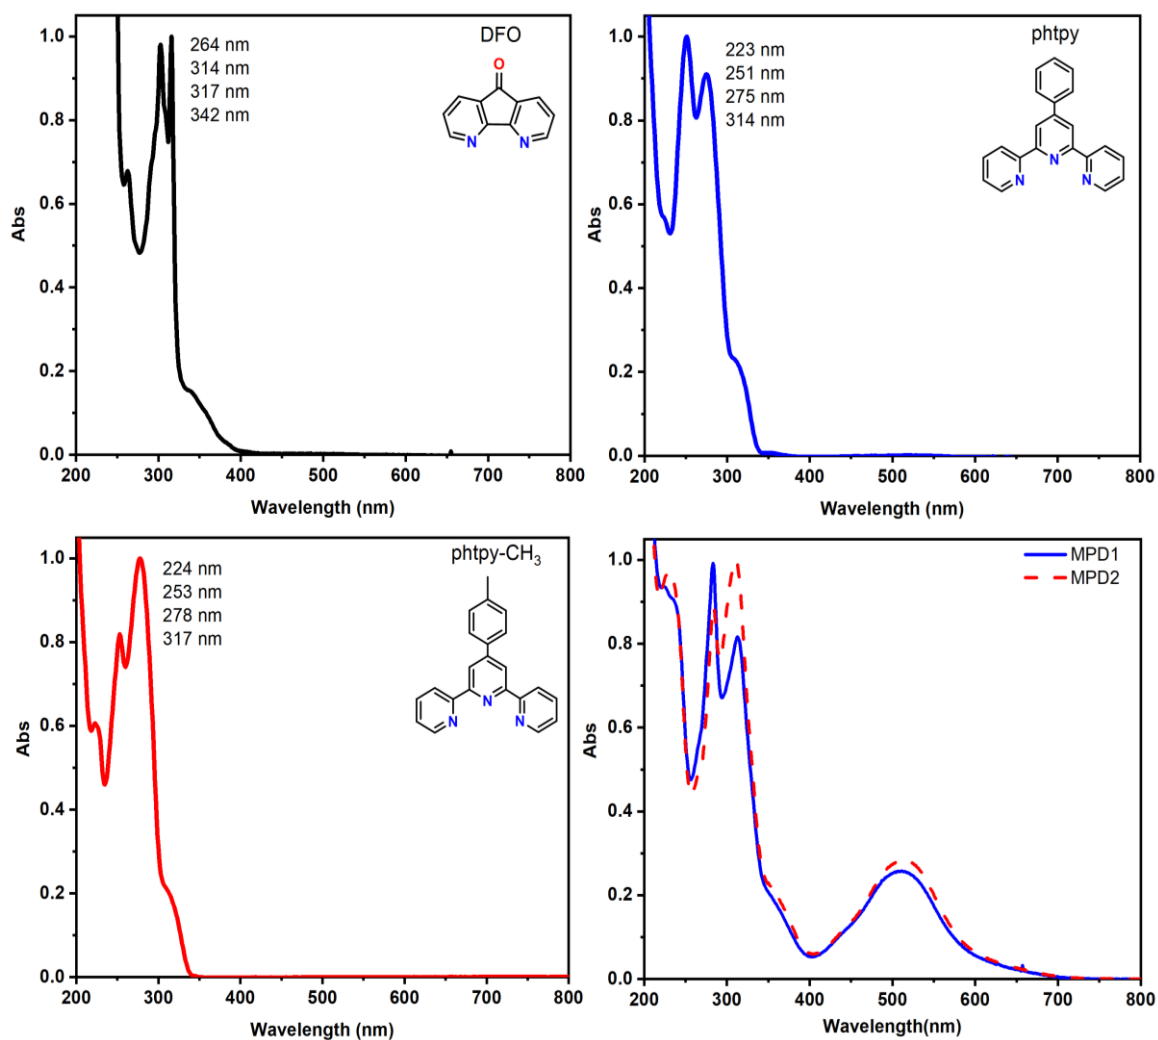

**Fig. S7.** Electronic absorption spectra of **DFO** (top, left), **phtpy** (top, right), **phtpy-CH<sub>3</sub>** (bottom, left), **MPD1** and **MPD2** ( $3 \times 10^{-5}$  mol L<sup>-1</sup>, bottom right), in acetonitrile at 25 °C.



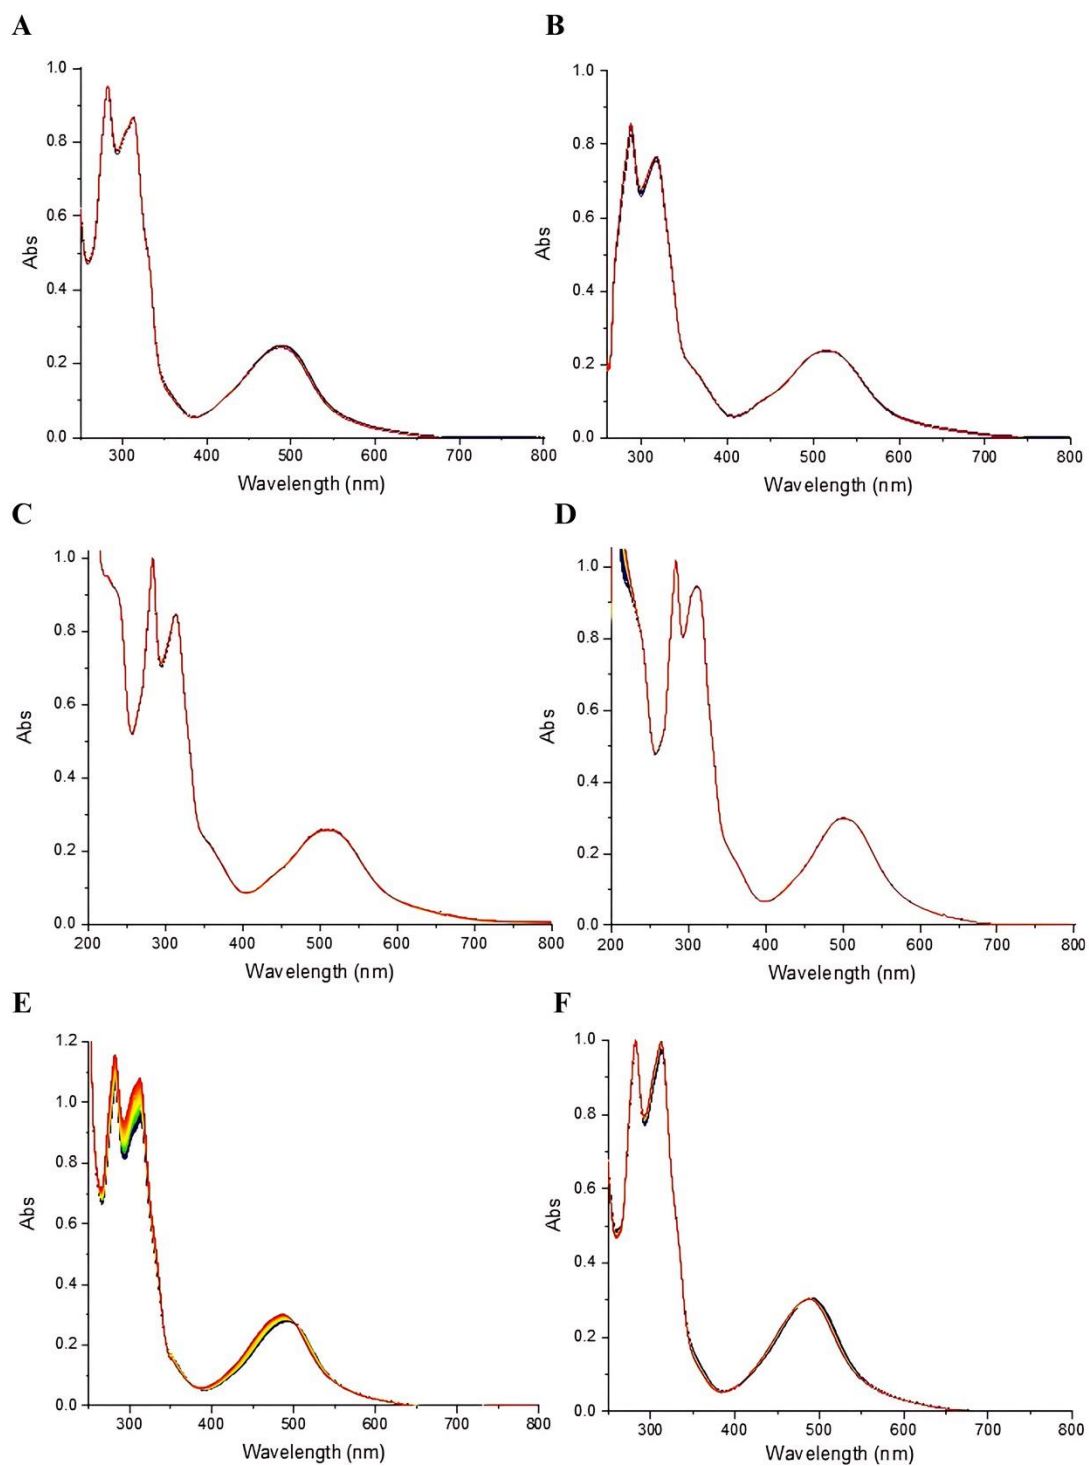

**Fig. S8.** Monitoring stability of **MPD1** ( $3 \times 10^{-5} \text{ mol L}^{-1}$ ) under the following conditions: in  $0.1 \text{ mmol L}^{-1}$  phosphate buffer pH 7.4 (A), DMSO (B), acetonitrile (C) and methanol (D) in the dark for 2 h; or in  $0.1 \text{ mmol L}^{-1}$  phosphate buffer pH 7.4 (E) monitored for 24 h and in  $0.1 \text{ mmol L}^{-1}$  phosphate buffer pH 7.4 (F) irradiated with blue light for 2 h at  $25^\circ\text{C}$ .

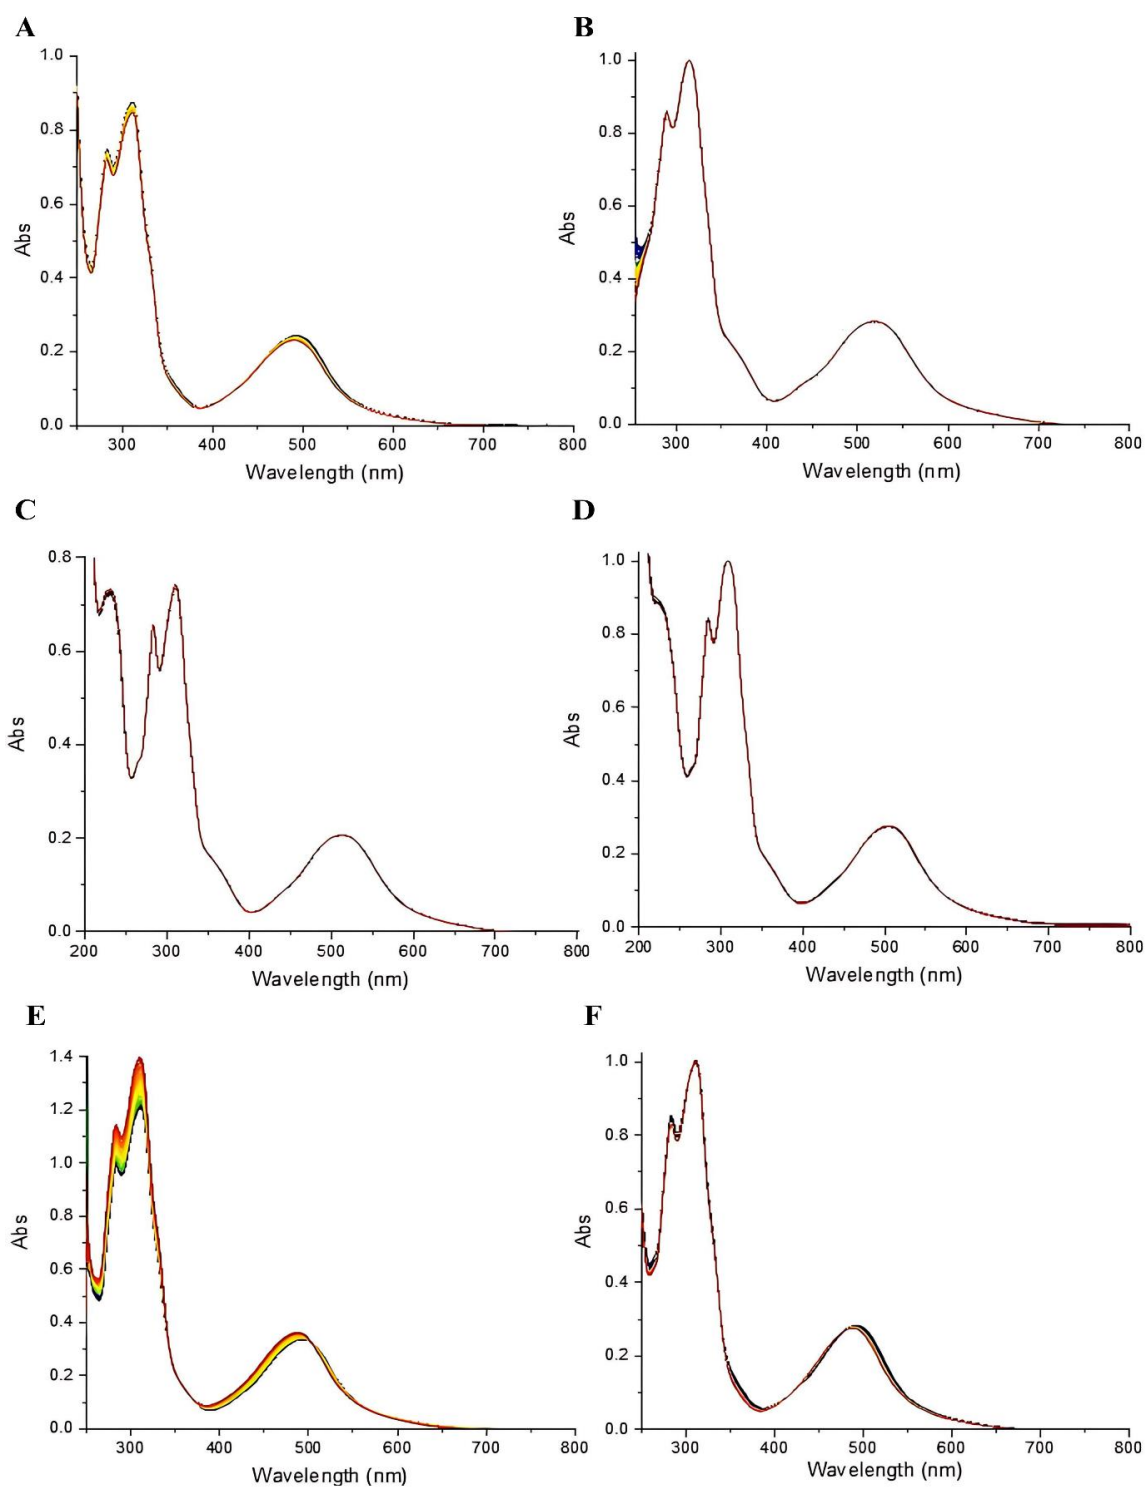

**Fig. S9.** Monitoring stability of **MPD2** ( $3 \times 10^{-5} \text{ mol L}^{-1}$ ) under the following conditions: in  $0.1 \text{ mmol L}^{-1}$  phosphate buffer pH 7.4 (A), DMSO (B), acetonitrile (C) and methanol (D) in the dark for 2 h; or in  $0.1 \text{ mmol L}^{-1}$  phosphate buffer pH 7.4 (E) monitored for 24 h and in  $0.1 \text{ mmol L}^{-1}$  phosphate buffer pH 7.4 (F) irradiated with blue light for 2 h at 25 °C.

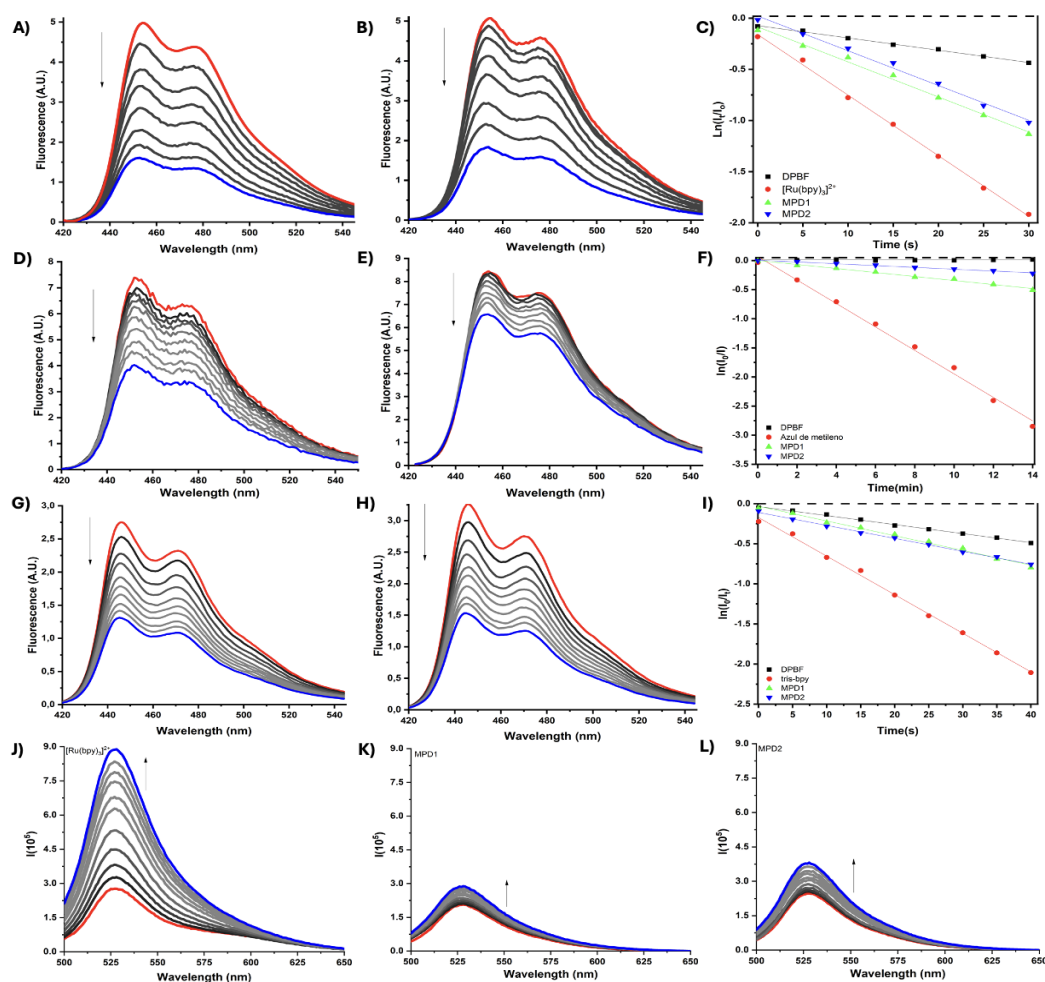

**Fig. S10. Production of reactive oxygen species as singlet oxygen using DPBF and SOSG.** Panel A and B show the emission spectra of DPBF  $10 \mu\text{mol L}^{-1}$  with **MPD1** and **MPD2**  $10 \mu\text{mol L}^{-1}$  upon blue light irradiation, respectively, in acetonitrile. Panels D and E show emission spectra of similar sample upon red light irradiation. Panels G and H show emission spectra of similar sample upon blue light irradiation in methanol. Panels C and I show time-dependent curves for relative emission for quantum yield measurements of samples irradiated with blue light in acetonitrile or methanol, respectively, while panel F shows these measurements irradiated with red light in acetonitrile. The black squares are of DPBF only, red triangles of **MPD1**, green diamond of **MPD2** and blue circles of the standard probe ( $[\text{Ru}(\text{bpy})_3]^{2+}$ ). Panels J, K and L show the emission spectra of SOSG  $5 \mu\text{mol L}^{-1}$  with **MPD1** and **MPD2**  $10 \mu\text{mol L}^{-1}$  upon blue light irradiation, respectively, in methanol.

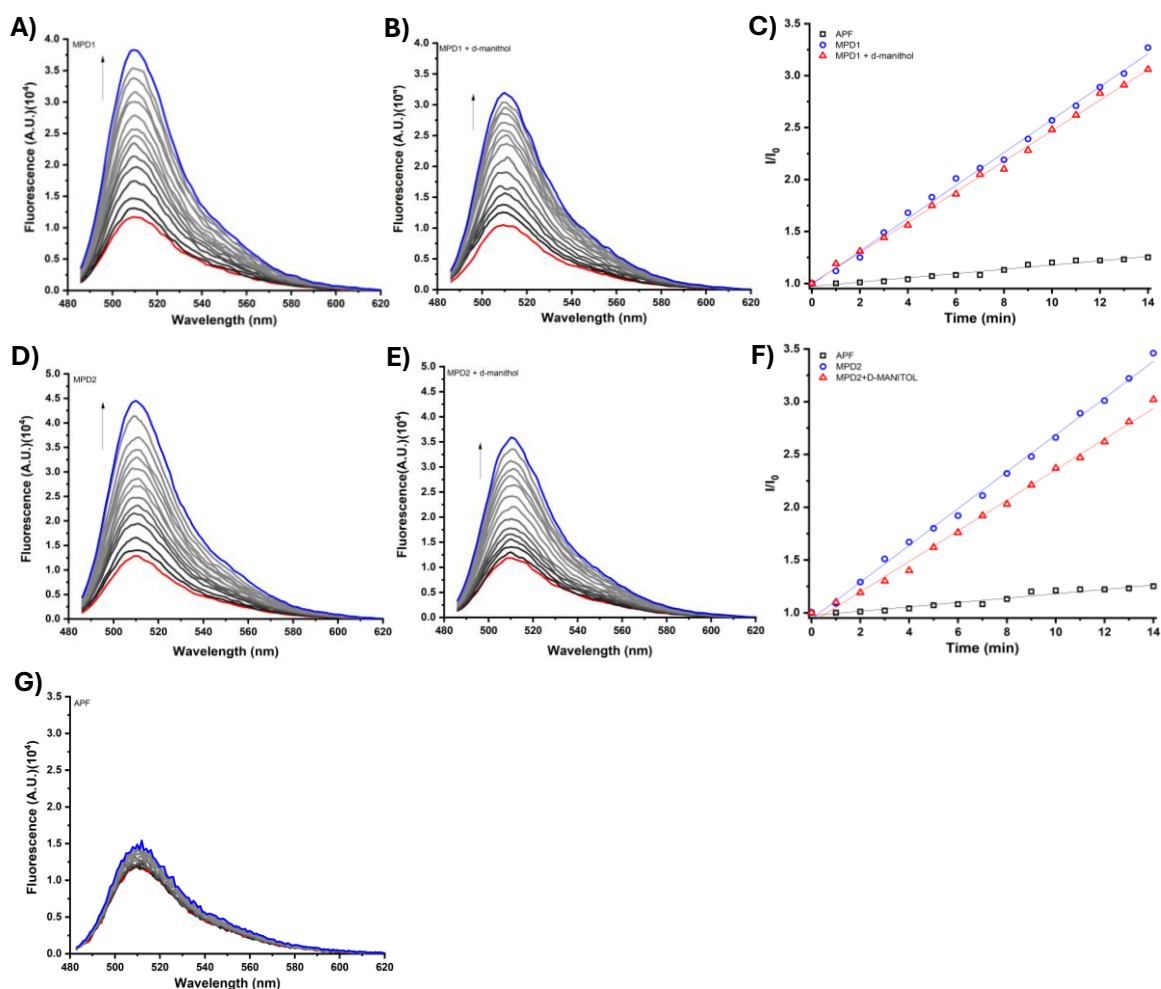

**Fig. S11. Production of reactive oxygen species as hydroxyl radical using APF.**

Panels A and D show the emission spectra of **MPD1** and **MPD2**  $10 \mu\text{mol L}^{-1}$  with APF  $5 \mu\text{mol L}^{-1}$  upon blue light irradiation in  $0.1 \text{ mmol L}^{-1}$  tris buffer pH 7.4, respectively; Panels B and E show emission spectra of **MPD1** and **MPD2** with d-mannitol upon blue light irradiation. Panels C and F shows time-dependent curves for relative emission for quantum yield measurements of hydroxyl radicals, irradiated with blue light, where black squares are of APF only, blue circles are of the metal complexes and red triangles are of the metal complexes+d-mannitol. Panel G shows the emission spectra for a sample of only APF irradiated with blue light.

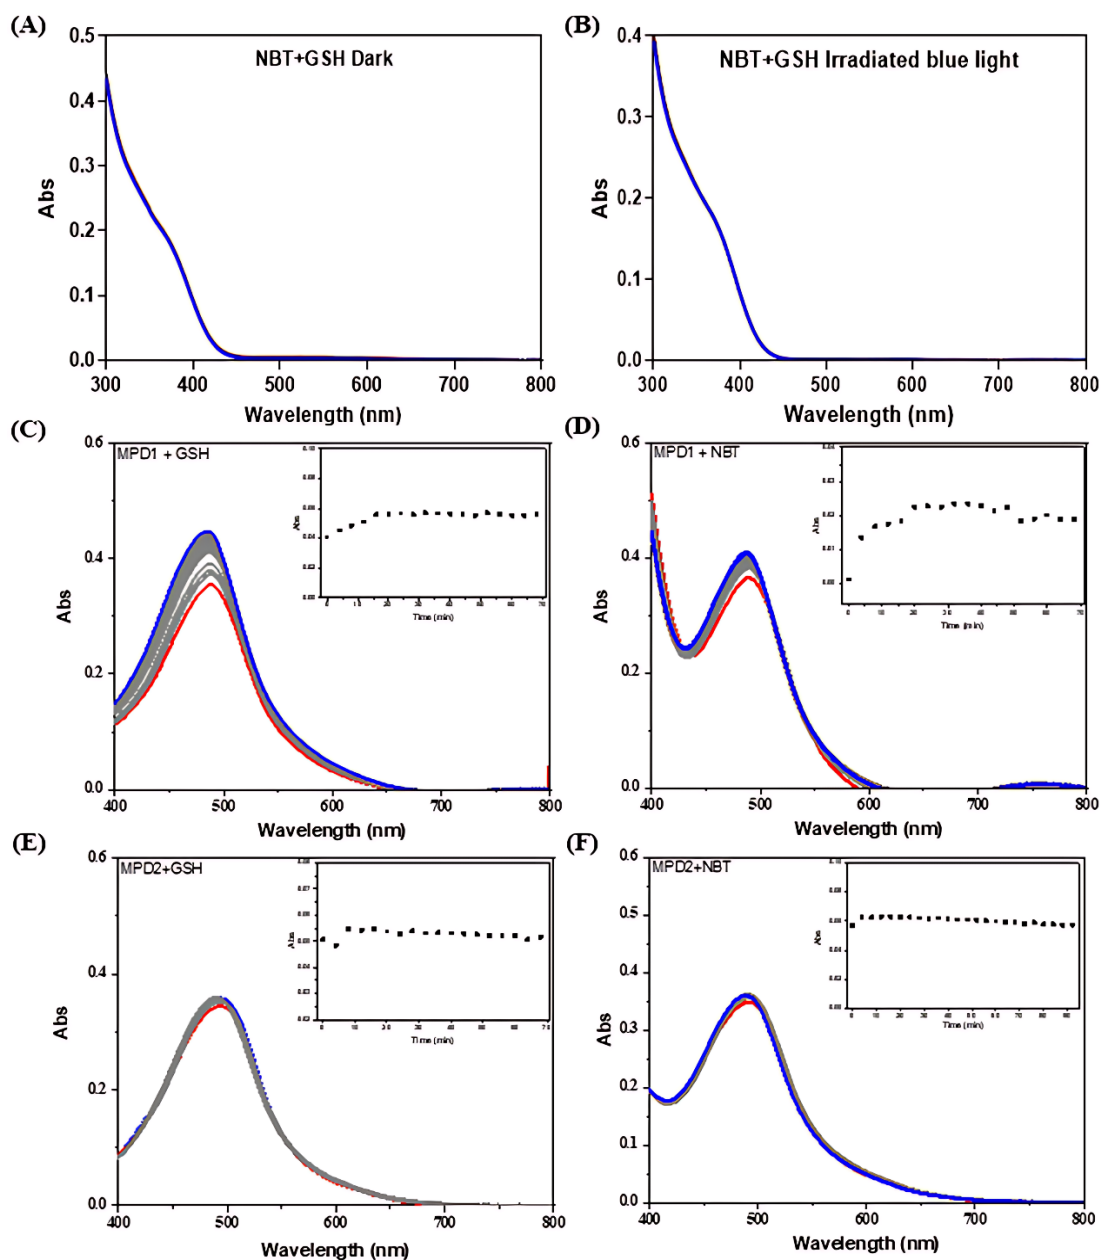

**Fig. S12.** Monitoring the mixture of MPD1 and MPD2  $35 \mu\text{mol L}^{-1}$ ; NBT  $50 \mu\text{mol L}^{-1}$  and glutathione  $1.5 \text{mmol L}^{-1}$  in  $0.1 \text{mol L}^{-1}$  phosphate buffer pH 7.4, for 1 h under the following conditions: A) in the dark; B) irradiated with blue light. Other reaction controls involving the mixture of the metal complexes with NBT or GSH: C) GSH and MPD1 only irradiated with blue light; D) NBT and MPD1 only irradiated with blue light; E) GSH and MPD2 only irradiated with blue light; F) NBT and MPD2 only irradiated with blue light.

(A)

(B)

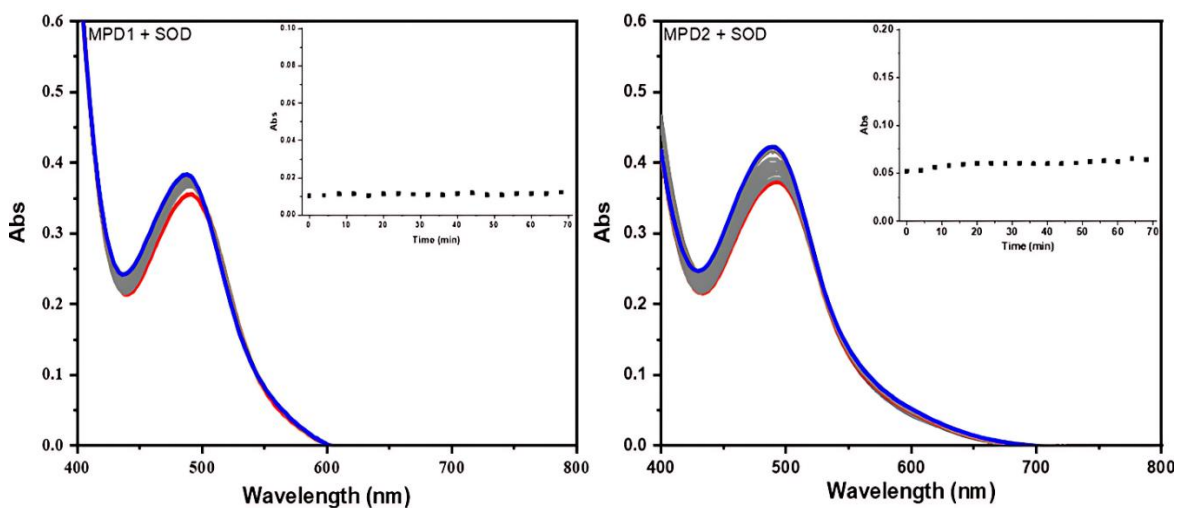

(C)

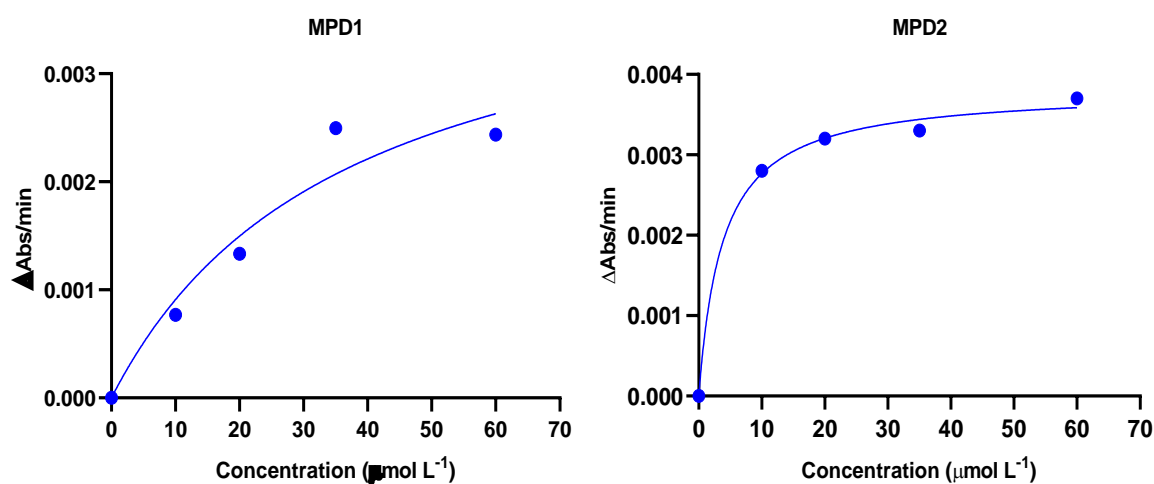

**Fig. S13.** Detection of the superoxide radical by the complexes **MPD1** and **MPD2** ( $35 \mu\text{mol L}^{-1}$ ), in  $0.1 \text{ mol L}^{-1}$  phosphate buffer pH 7.4, GSH  $1.5 \text{ mmol L}^{-1}$ , NBT  $50 \mu\text{mol L}^{-1}$ , SOD  $4.4 \text{ U/mL}$ , under the following conditions: a) **MPD1**, irradiated with blue light, with GSH, NBT and SOD; b) **MPD2**, irradiated with blue light, with GSH, NBT and SOD; c) Plot of the rate of superoxide radical production from the reaction of **MPD1** and **MPD2** complexes.

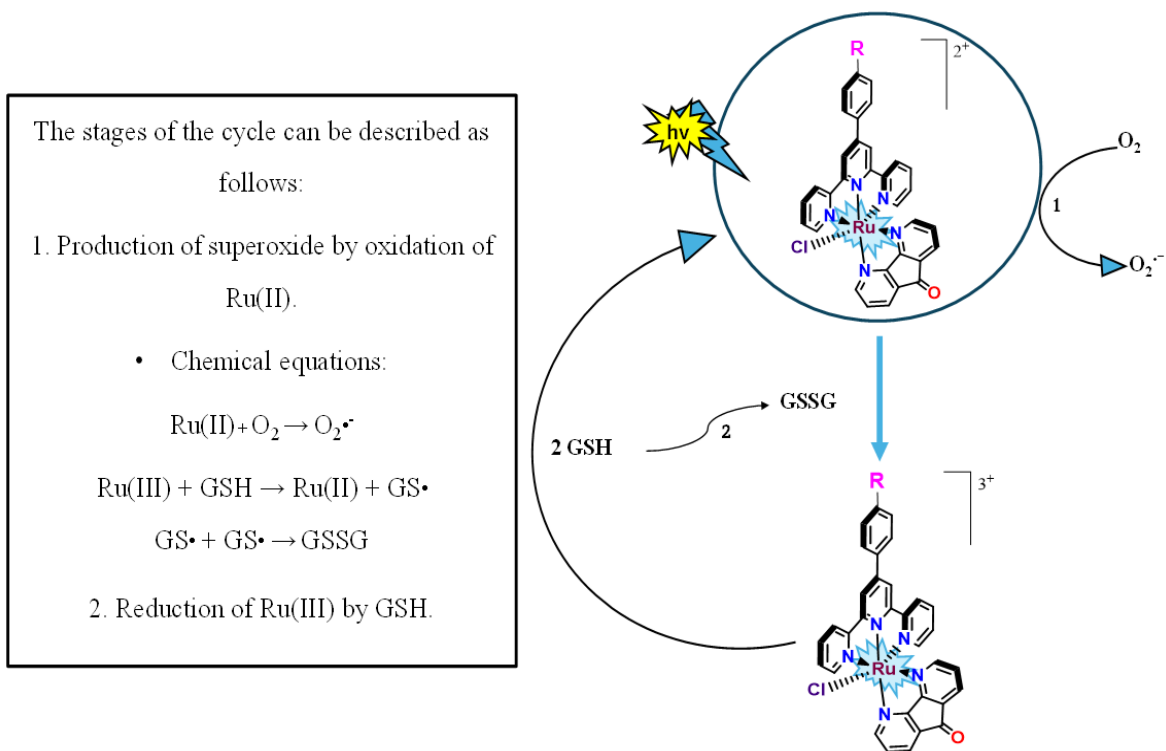

**Fig. S14.** Proposal of a catalytic cycle for the reduction of the metal complexes by GSH with the production of superoxide radical.

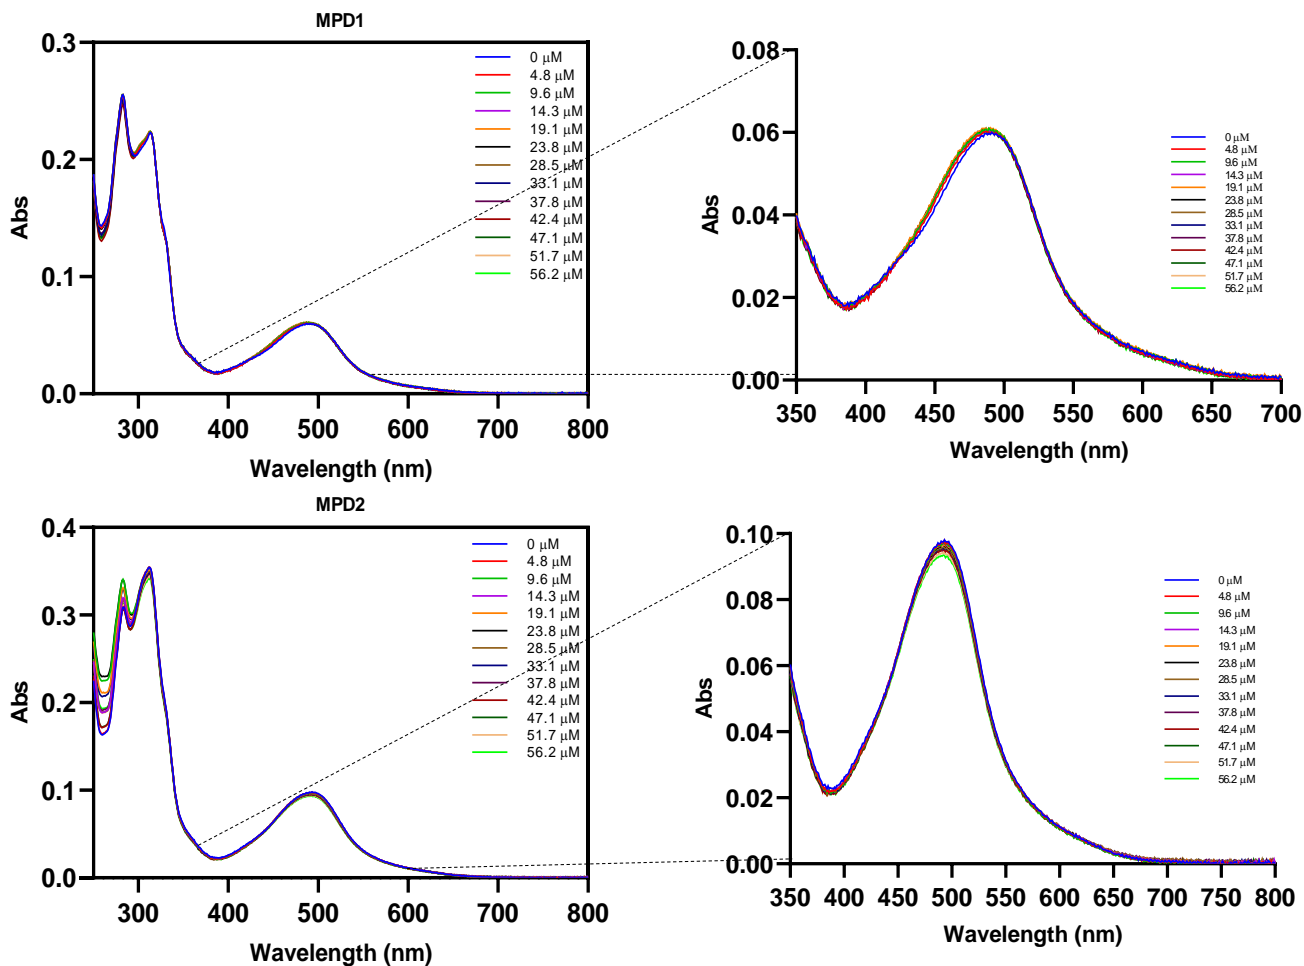

**Fig. S15.** DNA binding measurements. Panels show titration of **MPD1** (top) and **MPD2** (bottom) with calf thymus DNA monitored by UV-vis electronic spectroscopy, in 0.1 mmol L<sup>-1</sup> tris-HCl pH 7.4 at 25 °C.



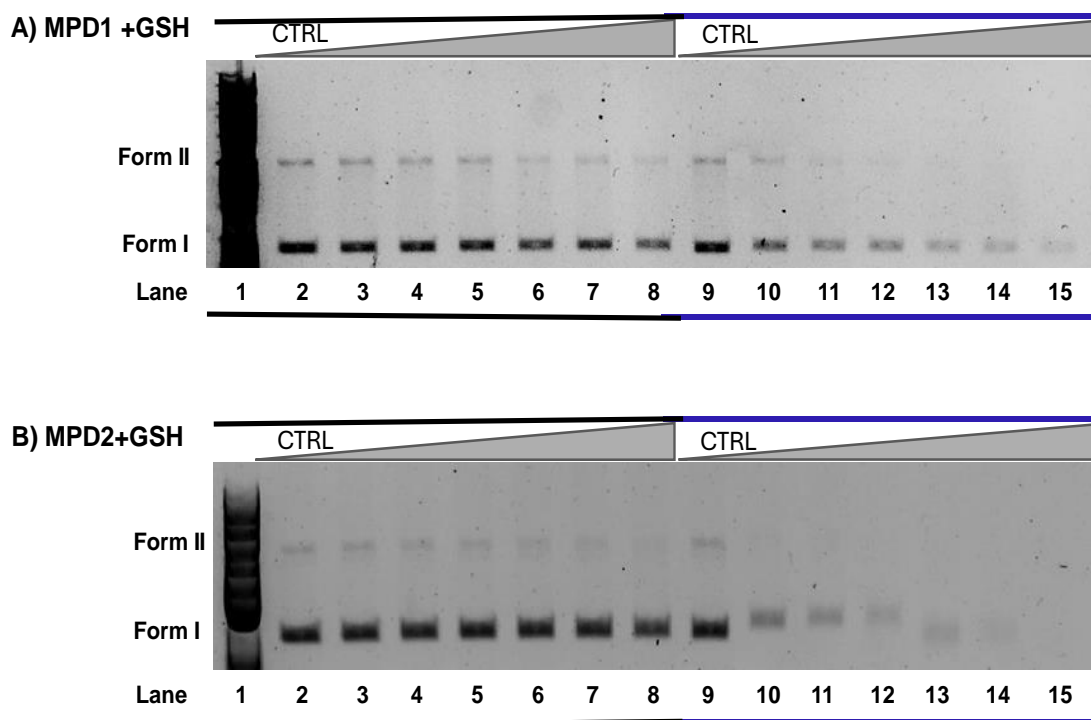

**Fig. S16.** Photocleavage of  $20 \mu\text{mol L}^{-1}$  (in base pairs) of pUC19 DNA in the presence of **MPD1** or **MPD2** and GSH ( $5 \text{ mmol L}^{-1}$ ) either in the dark or upon 1 h of blue LED irradiation (negative images). In all experiments, lane 1 contains only linear DNA ladder, while lanes 2 and 9 contain only pUC19 DNA, and lanes 3-8 or 10-15 contained pUC19 with **MPD1** (Panel A) and **MPD2** (Panel B) at increasing concentrations ( $5, 10, 20, 30, 40$  and  $60 \mu\text{mol L}^{-1}$ ). The black and blue boxes indicate that the experiment was carried out in the dark or with blue light irradiation.

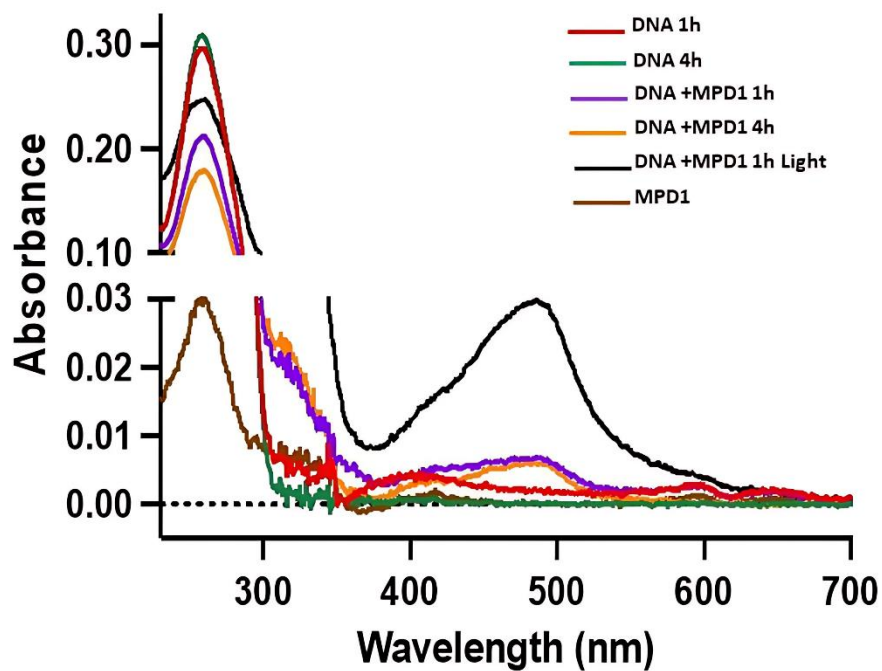

(A)

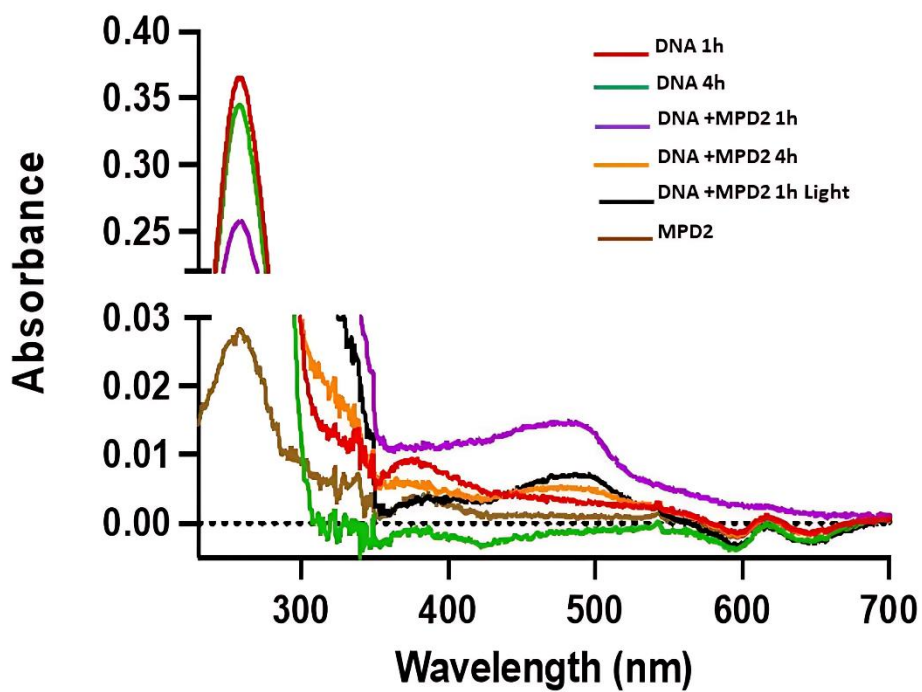

(B)

**Fig. S17.** Electronic spectra for excluded samples upon treatment onto a biospin column P30 (Bio-rad). **MPD1** (A) and **MPD2** (B) (DNA, complex +DNA (dark), complex +DNA (light,  $\lambda_{irr.}=453$  nm), DNA, complex).

**Table S1.** Carbon-13 NMR signal assignment for the MPD1 complex.

| <sup>13</sup> C chemical shifts of the MPD1 |        |        |        |        |        |        |        |
|---------------------------------------------|--------|--------|--------|--------|--------|--------|--------|
| Group (Ring A)                              | δ(ppm) | Ring B | δ(ppm) | Ring C | δ(ppm) | Ring D | δ(ppm) |
| C5                                          | 146,0  | C5'    | 136,83 | C5''   | 137,62 | C1     | 128    |
| C6                                          | 120    | C6'    | 124,3  | C6''   | 124,00 | C2'    | 129,5  |
| C7                                          | 159,14 | C7'    | 136,83 | C7''   | 137,62 | C3     | 129,7  |
| C8                                          | 159,4  | C8'    | 128    | C8''   | 130,6  | C4     | 136,0  |
| C9                                          | 120    | C9'    | 153,9  | C9''   | 155    |        |        |
| DFO ligand                                  | δ(ppm) |        |        |        |        |        |        |
| C2                                          | 155    |        |        |        |        |        |        |
| C3                                          | 128,8  |        |        |        |        |        |        |
| C4                                          | 130,83 |        |        |        |        |        |        |
| C5                                          | 130,06 |        |        |        |        |        |        |
| C6                                          | 187,7  |        |        |        |        |        |        |
| C7                                          | 131,9  |        |        |        |        |        |        |
| C8                                          | 132,00 |        |        |        |        |        |        |
| C9                                          | 130,94 |        |        |        |        |        |        |
| C10                                         | 155,4  |        |        |        |        |        |        |
| C11                                         | 167,32 |        |        |        |        |        |        |
| C12                                         | 166,13 |        |        |        |        |        |        |

**Table S2.** Carbon-13 NMR signal assignment for the MPD2 complex.

<sup>13</sup>C chemical shifts of the MPD2

| Group (Ring A) | δ(ppm) | Ring B            | δ(ppm) | Ring C | δ(ppm) | Ring D          | δ(ppm) |
|----------------|--------|-------------------|--------|--------|--------|-----------------|--------|
| C5             | 146    | C5'               | 154,00 | C5''   | 154,00 | C1              | 140,38 |
| C6             | 124    | C6'               | 124,3  | C6''   | 127,85 | C2'             | 129,5  |
| C7             | 159,13 | C7'               | 137,55 | C7''   | 137,62 | C3              | 129,56 |
| C8             | 154    | C8'               | 155    | C8''   | 155,4  | C4              | 134    |
| C9             | 120    | C9'               | 154,00 | C9''   | 130,6  | CH <sub>3</sub> | 21,5   |
| DFO ligand     | δ(ppm) | R-CH <sub>3</sub> | δ(ppm) |        |        |                 |        |
| C2             | 155    | CH <sub>3</sub>   | 21,5   |        |        |                 |        |
| C3             | 128,8  |                   |        |        |        |                 |        |
| C4             | 137,62 |                   |        |        |        |                 |        |
| C5             | 130,70 |                   |        |        |        |                 |        |
| C6             | 187,95 |                   |        |        |        |                 |        |
| C7             | 131,9  |                   |        |        |        |                 |        |
| C8             | 137,62 |                   |        |        |        |                 |        |
| C9             | 130,98 |                   |        |        |        |                 |        |
| C10            | 155,4  |                   |        |        |        |                 |        |
| C11            | 167,32 |                   |        |        |        |                 |        |
| C12            | 166,13 |                   |        |        |        |                 |        |

**Table S3.** Selected experimental bands in the FTIR spectrum and the theoretical frequencies,  $\nu(\text{cm}^{-1})$  of MPD1 and MPD2.

| MPD1         |      |                       | MPD2         |      |                       |
|--------------|------|-----------------------|--------------|------|-----------------------|
| Experimental | DFT  | Assignments           | Experimental | DFT  | Assignments           |
| 557          | 516  | $\delta(\text{PF}_6)$ | 559          | 612  | $\delta(\text{PF}_6)$ |
| 850          | 788  | $\nu(\text{PF}_6)$    | 850          | 788  | $\nu(\text{PF}_6)$    |
| 1580         | 1516 | $\nu(\text{CN})$      | 1573         | 1540 | $\nu(\text{CN})$      |
| 1640         | 1644 | $\nu(\text{CC})$      | 1608         | 1628 | $\nu(\text{CC})$      |
| 1735         | 1716 | $\nu(\text{CO})$      | 1737         | 1716 | $\nu(\text{CO})$      |
| 3044         | 3196 | $\nu(\text{Csp}^2)$   | 2920         | 3180 | $\nu(\text{Csp}^3)$   |
| -            | -    | -                     | 3053         | 3228 | $\nu(\text{Csp}^2)$   |

**Table S4.** Selected UV–Vis Energy Transitions at the TD-DFT/B3LYP Level for  
MPD1 in acetonitrile.

| Exptl.<br>$\lambda$ (nm) | Calc. $\lambda$<br>(nm) | Major contribution           | Character                                          |      |
|--------------------------|-------------------------|------------------------------|----------------------------------------------------|------|
| 510                      | 468                     | H-1 $\rightarrow$ L+1 (66%)  | $\rho\pi^*$ (phtpy) $\leftarrow$ $d\pi$ (Ru)       | MLCT |
|                          |                         | HOMO $\rightarrow$ L+3 (28%) | $\rho\pi^*$ (phtpy) $\leftarrow$ $d\pi$ (Ru)       | MLCT |
|                          |                         | H-2 $\rightarrow$ L+1 (31%)  | $\rho\pi^*$ (phtpy) $\leftarrow$ $d\pi$ (Ru)       | MLCT |
|                          |                         | H-1 $\rightarrow$ L+2(62%)   | $\rho\pi^*$ (DFO) $\leftarrow$ $d\pi$ (Ru)         | MLCT |
|                          |                         | H-1 $\rightarrow$ L+3(94%)   | $\rho\pi^*$ (phtpy) $\leftarrow$ $d\pi$ (Ru)       | MLCT |
| 364                      | 353                     | H-3 $\rightarrow$ L+1 (90%)  | $\rho\pi^*$ (phtpy) $\leftarrow$ $\rho\pi$ (phtpy) | IL   |
|                          |                         | H-4 $\rightarrow$ L+1 (67%)  | $\rho\pi^*$ (phtpy) $\leftarrow$ $\rho\pi$ (phtpy) | IL   |
|                          |                         | H-3 $\rightarrow$ L+3 (11%)  | $\rho\pi^*$ (phtpy) $\leftarrow$ $\rho\pi$ (phtpy) | IL   |
| 314                      | -                       | H-3 $\rightarrow$ L+1 (90%)  | $\rho\pi^*$ (phtpy) $\leftarrow$ $\rho\pi$ (phtpy) | IL   |
|                          |                         | H-4 $\rightarrow$ L+1 (67%)  | $\rho\pi^*$ (phtpy) $\leftarrow$ $\rho\pi$ (phtpy) | IL   |
| 283                      | 295                     | H-7 $\rightarrow$ L+1 (95%)  | $\rho\pi^*$ (DFO) $\leftarrow$ $\rho\pi$ (phtpy)   | LLCT |
|                          |                         | H-8 $\rightarrow$ L+3 (89%)  | $\rho\pi^*$ (phtpy) $\leftarrow$ $\rho\pi$ (Cl)    | LLCT |
|                          |                         | H-6 $\rightarrow$ L+3 (30%)  | $\rho\pi^*$ (phtpy) $\leftarrow$ $\rho\pi$ (Cl)    | LLCT |
|                          |                         | H-4 $\rightarrow$ L+3 (52%)  | $\rho\pi^*$ (phtpy) $\leftarrow$ $\rho\pi$ (phtpy) | IL   |
| 231                      | 243                     | H-4 $\rightarrow$ L+6 (60%)  | $\rho\pi^*$ (phtpy) $\leftarrow$ $\rho\pi$ (phtpy) | IL   |
|                          |                         | H-10 $\rightarrow$ L+3 (49%) | $\rho\pi^*$ (phtpy) $\leftarrow$ $\rho\pi$ (phtpy) | IL   |
|                          |                         | H-4 $\rightarrow$ L+5 (36%)  | $\rho\pi^*$ (phtpy) $\leftarrow$ $\rho\pi$ (phtpy) | IL   |

**Table S5.** Selected UV–Vis Energy Transitions at the TD-DFT/B3LYP Level for MPD2 in acetonitrile.

| Exptl. $\lambda$ (nm) | Calc. $\lambda$ (nm) | Major contribution           | Character                                          |      |
|-----------------------|----------------------|------------------------------|----------------------------------------------------|------|
| 513                   | 470                  | H-2 $\rightarrow$ L+1 (58%)  | $\rho\pi^*$ (phtpy) $\leftarrow$ d $\pi$ (Ru)      | MLCT |
|                       |                      | H-1 $\rightarrow$ L+2 (35%)  | $\rho\pi^*$ (DFO) $\leftarrow$ d $\pi$ (Ru)        | MLCT |
|                       |                      | H-2 $\rightarrow$ L+2(39%)   | $\rho\pi^*$ (DFO) $\leftarrow$ d $\pi$ (Ru)        | MLCT |
|                       |                      | HOMO $\rightarrow$ L+3(43%)  | $\rho\pi^*$ (phtpy) $\leftarrow$ d $\pi$ (Ru)      | MLCT |
| 364                   | 353                  | H-3 $\rightarrow$ L+1 (95%)  | $\rho\pi^*$ (phtpy) $\leftarrow$ $\rho\pi$ (phtpy) | IL   |
|                       |                      | H-8 $\rightarrow$ LUMO (95%) | $\rho\pi^*$ (DFO) $\leftarrow$ $\rho\pi$ (Cl)      | LLCT |
| 310                   | -                    | H-6 $\rightarrow$ L+1 (20%)  | $\rho\pi^*$ (phtpy) $\leftarrow$ $\rho\pi$ (Cl)    | LLCT |
|                       |                      | H-4 $\rightarrow$ L+1 (41%)  | $\rho\pi^*$ (phtpy) $\leftarrow$ $\rho\pi$ (phtpy) | IL   |
|                       |                      | H-3 $\rightarrow$ L+3 (31%)  | $\rho\pi^*$ (phtpy) $\leftarrow$ $\rho\pi$ (phtpy) | IL   |
| 276                   | 293                  | H-6 $\rightarrow$ L+2 (66%)  | $\rho\pi^*$ (DFO) $\leftarrow$ $\rho\pi$ (Cl)      | LLCT |
|                       |                      | H-5 $\rightarrow$ L+1 (19%)  | $\rho\pi^*$ (phtpy) $\leftarrow$ $\rho\pi$ (phtpy) | IL   |
|                       |                      | H-6 $\rightarrow$ L+1 (39%)  | $\rho\pi^*$ (phtpy) $\leftarrow$ $\rho\pi$ (Cl)    | LLCT |
|                       |                      | H-6 $\rightarrow$ L+3 (34%)  | $\rho\pi^*$ (phtpy) $\leftarrow$ $\rho\pi$ (Cl)    | LLCT |
|                       |                      | H-4 $\rightarrow$ L+3 (53%)  | $\rho\pi^*$ (phtpy) $\leftarrow$ $\rho\pi$ (phtpy) | IL   |
| 257                   | 241                  | H-3 $\rightarrow$ L+7 (74%)  | $\rho\pi^*$ (phtpy) $\leftarrow$ $\rho\pi$ (phtpy) | IL   |
|                       |                      | H-10 $\rightarrow$ L+3 (43%) | $\rho\pi^*$ (phtpy) $\leftarrow$ $\rho\pi$ (phtpy) | IL   |
|                       |                      | H-4 $\rightarrow$ L+5 (42%)  | $\rho\pi^*$ (phtpy) $\leftarrow$ $\rho\pi$ (phtpy) | IL   |

**Table S6.** Antimicrobial Assay using **MPD1** and **MPD2**.

| <b>Metal Complex</b> | <b>RED LED</b>  |                  | <b><i>P. aeruginosa</i></b><br><b>ATCC 27854</b> | <b><i>E. coli</i></b><br><b>ATCC 11303</b> |
|----------------------|-----------------|------------------|--------------------------------------------------|--------------------------------------------|
| <b><i>MPD1</i></b>   | On              | <sup>a</sup> MIC | ND                                               | ND                                         |
|                      |                 | <sup>b</sup> MBC | ND                                               | ND                                         |
|                      | Off             | MIC              | ND                                               | ND                                         |
|                      |                 | MBC              | ND                                               | ND                                         |
| <b><i>MPD2</i></b>   | On              | MIC              | 125<br>(256.48)                                  | 125<br>(256.48)                            |
|                      |                 | MBC              | 125<br>(256.48)                                  | ND                                         |
|                      | Off             | MIC              | 125<br>(256.48)                                  | 125<br>(256.48)                            |
|                      |                 | MBC              | 125<br>(256.48)                                  | ND                                         |
| <b>Metal Complex</b> | <b>BLUE LED</b> |                  | <b><i>P. aeruginosa</i></b><br><b>ATCC 27854</b> | <b><i>E. coli</i></b><br><b>ATCC 11303</b> |
| <b><i>MPD1</i></b>   | On              | MIC              | ND                                               | ND                                         |
|                      |                 | MBC              | ND                                               | ND                                         |
|                      | Off             | MIC              | ND                                               | ND                                         |
|                      |                 | MBC              | ND                                               | ND                                         |
| <b><i>MPD2</i></b>   | On              | MIC              | 125<br>(256.48)                                  | 125<br>(256.48)                            |
|                      |                 | MBC              | 125<br>(256.48)                                  | ND                                         |
|                      | Off             | MIC              | 125<br>(256.48)                                  | 125<br>(256.48)                            |
|                      |                 | MBC              | 125<br>(256.48)                                  | ND                                         |

<sup>a</sup>Minimum inhibitory concentration. <sup>b</sup>Minimum bactericidal activity. \*MIC and MBC reported in  $\mu\text{g/mL}$  ( $\mu\text{M}$ ). (ND) not detected.
